# Supplementary material
Source: PubMed Central journal article supplement (PMC3870487)
Supplement: Supp_Fig1.pdf [file Supp_Fig1.pdf]

| ID       | R1 | R2                                                       | R3                                                       | R4                 |
|----------|----|----------------------------------------------------------|----------------------------------------------------------|--------------------|
|          | H  | C <sub>6</sub> H <sub>5</sub>                            | C <sub>6</sub> H <sub>5</sub>                            | CO <sub>2</sub> Et |
| C6       | H  | C <sub>6</sub> H <sub>5</sub>                            | <i>p</i> -C <sub>6</sub> H <sub>4</sub> OCH <sub>3</sub> | CO <sub>2</sub> Et |
| C5       | H  | C <sub>6</sub> H <sub>5</sub>                            | <i>p</i> -C <sub>6</sub> H <sub>4</sub> Br               | CO <sub>2</sub> Et |
| C3       | H  | C <sub>6</sub> H <sub>5</sub>                            | <i>p</i> -C <sub>6</sub> H <sub>4</sub> NO <sub>2</sub>  | CO <sub>2</sub> Et |
| C1       | H  | <i>p</i> -C <sub>6</sub> H <sub>4</sub> Br               | <i>p</i> -C <sub>6</sub> H <sub>4</sub> OCH <sub>3</sub> | CO <sub>2</sub> Et |
| C25      | H  | C <sub>6</sub> H <sub>5</sub>                            | <i>p</i> -C <sub>6</sub> H <sub>4</sub> OCH <sub>3</sub> | H                  |
| AAZ16-56 | H  | <i>p</i> -C <sub>6</sub> H <sub>4</sub> OCH <sub>3</sub> | C <sub>6</sub> H <sub>5</sub>                            | CO <sub>2</sub> Et |
| AAZ10-50 | H  | <i>m</i> -C <sub>6</sub> H <sub>4</sub> OCH <sub>3</sub> | C <sub>6</sub> H <sub>5</sub>                            | CO <sub>2</sub> Et |
| AKA57-B  | H  | C <sub>6</sub> H <sub>5</sub>                            | <i>m</i> -C <sub>6</sub> H <sub>4</sub> NO <sub>2</sub>  | CO <sub>2</sub> Et |

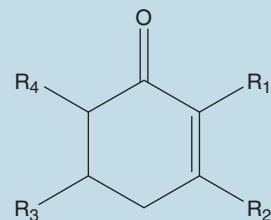

| ID       | miLogP | TPSA   | natoms | MW      | nOH | nOHNH | nviolations | nrotb | Volume  | CPRC ligand | Ion channel modulator | Kinase inhibitor | Nuclear receptor ligand |
|----------|--------|--------|--------|---------|-----|-------|-------------|-------|---------|-------------|-----------------------|------------------|-------------------------|
| C6       | 4.203  | 52.61  | 26     | 350.414 | 4   | 0     | 0           | 6     | 328.345 | -0.26       | -0.25                 | -0.77            | -0.30                   |
| C5       | 4.955  | 43.376 | 25     | 399.284 | 3   | 0     | 0           | 5     | 320.684 | -0.35       | -0.24                 | -0.77            | -0.52                   |
| C3       | 4.105  | 89.2   | 27     | 365.385 | 6   | 0     | 0           | 6     | 326.133 | -0.38       | -0.29                 | -0.87            | -0.41                   |
| C1       | 5.012  | 52.61  | 27     | 429.31  | 4   | 0     | 1           | 6     | 346.23  | -0.32       | -0.28                 | -0.72            | -0.46                   |
| C25      | 3.865  | 26.305 | 21     | 278.351 | 2   | 0     | 0           | 3     | 266.998 | -0.19       | -0.47                 | -0.65            | -0.18                   |
| AAZ16-56 | 4.203  | 52.61  | 26     | 350.414 | 4   | 0     | 0           | 6     | 328.345 | -0.26       | -0.25                 | -0.77            | -0.30                   |
| AAZ10-50 | 4.179  | 52.61  | 26     | 350.414 | 4   | 0     | 0           | 6     | 328.345 | -0.25       | -0.25                 | -0.78            | -0.28                   |
| AKA57-B  | 4.081  | 89.2   | 27     | 365.385 | 6   | 0     | 0           | 6     | 326.133 | -0.39       | -0.30                 | -0.87            | -0.41                   |

| ID         | Ar1                           | Ar2                                                      | R                 |
|------------|-------------------------------|----------------------------------------------------------|-------------------|
| AAZ17-A-58 | C <sub>6</sub> H <sub>5</sub> | <i>p</i> -C <sub>6</sub> H <sub>4</sub> OCH <sub>3</sub> | H                 |
| AAZ18-59   | C <sub>6</sub> H <sub>5</sub> | <i>p</i> -C <sub>6</sub> H <sub>4</sub> OCH <sub>3</sub> | COCH <sub>3</sub> |

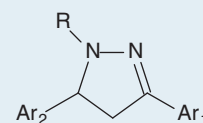

| ID         | miLogP | TPSA   | natoms | MW      | nOH | nOHNH | nviolations | nrotb | Volume  | CPRC ligand | Ion channel modulator | Kinase inhibitor | Nuclear receptor ligand |
|------------|--------|--------|--------|---------|-----|-------|-------------|-------|---------|-------------|-----------------------|------------------|-------------------------|
| AAZ17-A-58 | 3.374  | 33.625 | 19     | 252.317 | 3   | 1     | 0           | 3     | 239.448 | -0.64       | -0.81                 | -1.00            | -1.15                   |
| AAZ18-59   | 2.98   | 41.907 | 22     | 294.354 | 4   | 0     | 0           | 3     | 275.374 | -0.63       | -0.83                 | -1.25            | -1.14                   |

**Supplementary Fig. S1.** C25 analog structure descriptions with calculated molecular properties and bioactivities.
