# Supplementary material
Source: PubMed Central journal article supplement (PMC3870487)

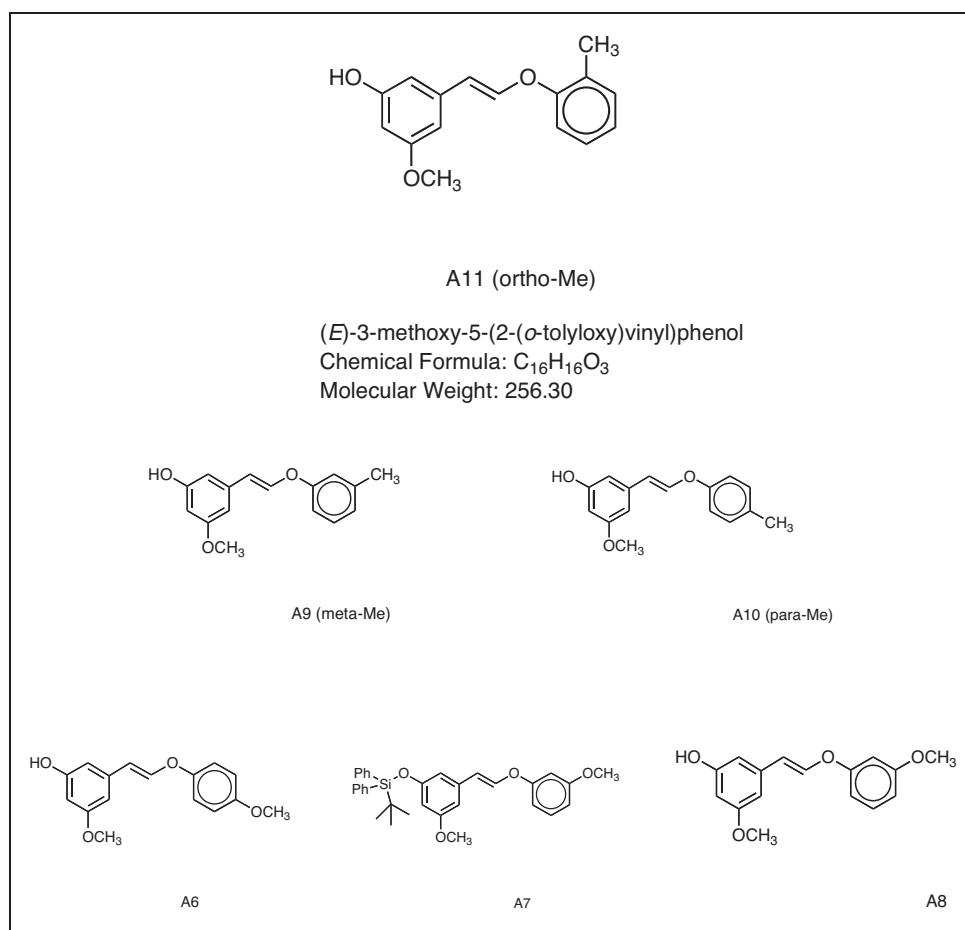

**Supplementary Fig. S2.** Chemical structure of the bioactive vinyl ether A11 and its analogs.

Supplement: Supp_Fig2.pdf [file Supp_Fig2.pdf]
